# Supplementary material
Source: PubMed Central journal article supplement (PMC1913797)

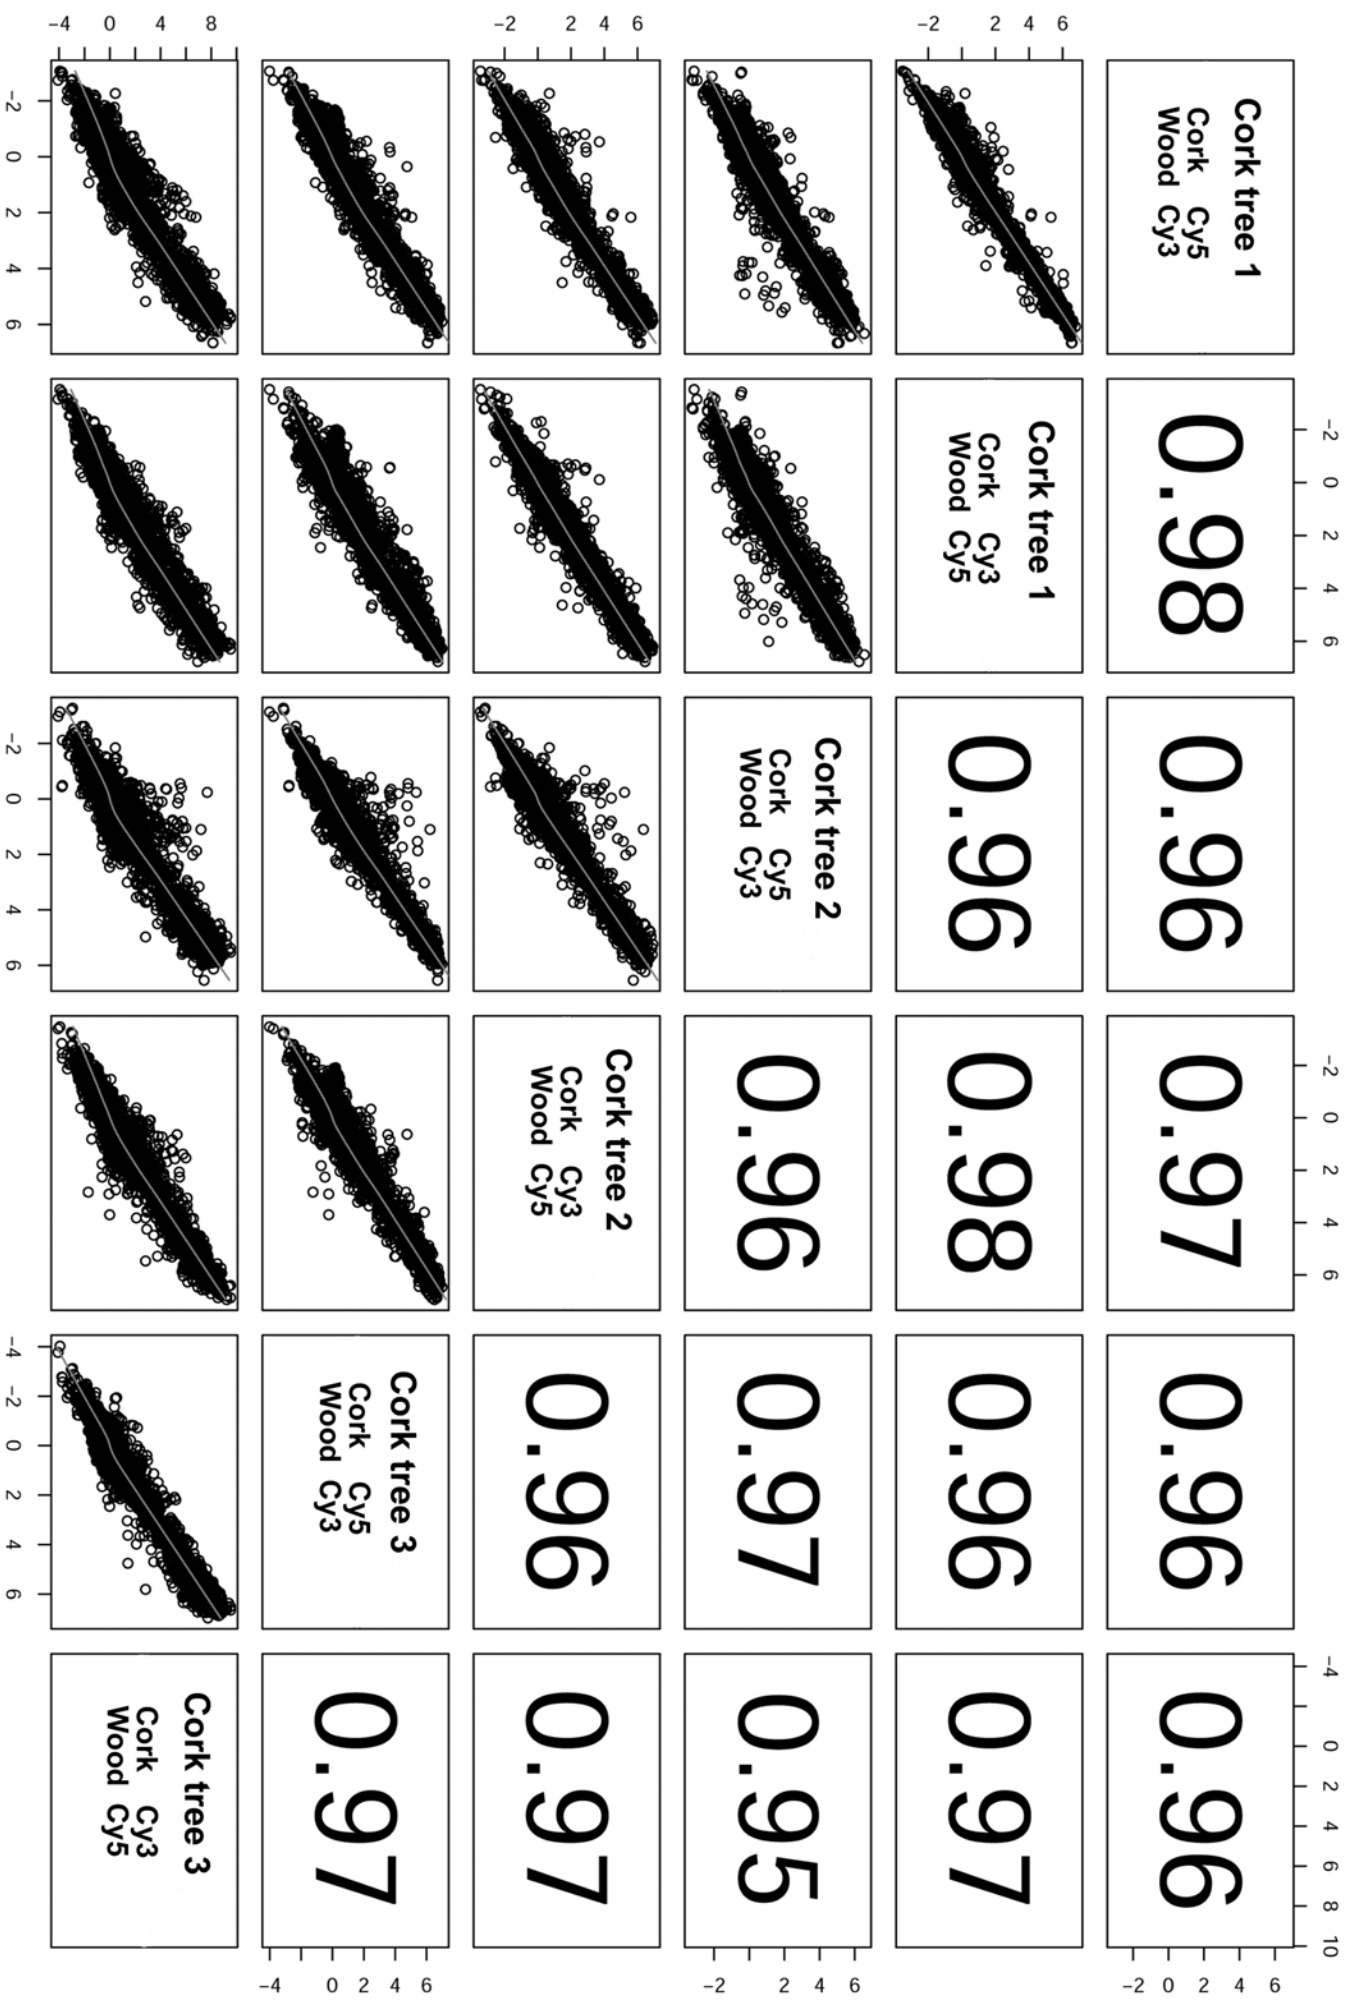

Supplement: plntphys_pp.106.094227_1.pdf [file plntphys_pp.106.094227_1.pdf]
